# Supplementary material for: Impact of West Antarctic Ice Shelf melting on the Southern Ocean Hydrography
Source: Copernicus journal article supplement (doi:10.5194/tc-2019-244), 2019-12-02
Supplement: Supplementary file 1 [file tc-2019-244-supplement.pdf]

Supplement of

**Impact of West Antarctic ice shelf melting on the Southern Ocean hydrography**

Yoshihiro Nakayama<sup>1,2</sup>, Ralph Timmermann<sup>2</sup>, and Hartmut Hellmer<sup>2</sup>

(1) Institute of Low Temperature Science, Hokkaido University, Japan.

(2) Alfred Wegener Institute Bussestrasse 24, Bremerhaven, Germany

**Contents of this file**

Tables S1 to S4

Figures S1 to S2

**Table S1.** Model parameters used for simulations in this study. Horizontal diffusivity and viscosity are scaled by area. For example, a grid element with an area of  $5.8 \times 10^9 \text{ m}^2$  or a  $1.5^\circ$  triangular grid at about  $60^\circ$  latitude yields a viscosity of  $6.0 \times 10^4 \text{ m}^2 \text{ s}^{-1}$  and a diffusivity of about  $1.8 \times 10^3 \text{ m}^2 \text{ s}^{-1}$ .

| Parameter                                                                      |                      |
|--------------------------------------------------------------------------------|----------------------|
| Horizontal diffusivity scaling factor ( $\text{m}^2 \text{ s}^{-1}$ )          | $1.8 \times 10^3$    |
| Background horizontal viscosity scaling factor ( $\text{m}^2 \text{ s}^{-1}$ ) | $6.0 \times 10^4$    |
| Scaling reference area ( $\text{m}^2$ )                                        | $5.8 \times 10^9$    |
| Background vertical diffusivity ( $\text{m}^2 \text{ s}^{-1}$ )                | $5.0 \times 10^{-5}$ |
| Background vertical viscosity ( $\text{m}^2 \text{ s}^{-1}$ )                  | $1.0 \times 10^{-3}$ |
| Bottom drag coefficient                                                        | $2.5 \times 10^{-3}$ |
| Air/sea ice drag coefficient                                                   | $2.5 \times 10^{-3}$ |
| Sea ice/ocean drag coefficient                                                 | $5.0 \times 10^{-3}$ |
| Sea ice salt concentration                                                     | $5.0 \times 10^{-2}$ |
| Lead closing (m)                                                               | 0.1                  |
| Ice strength ( $\text{N m}^{-2}$ )                                             | $1.5 \times 10^4$    |
| Sea ice dry albedo                                                             | 0.75                 |
| Sea ice wet albedo                                                             | 0.68                 |
| Snow dry albedo                                                                | 0.85                 |
| Snow wet albedo                                                                | 0.77                 |

**Table S2.** Description of sensitivity experiments.

---

| Simulation |                                                                                                                     |
|------------|---------------------------------------------------------------------------------------------------------------------|
| LMELT      | Turbulent heat and salt exchange coefficients multiplied by 1 only at ice shelf bases in the AS and BS (Table S3).  |
| MMELT      | Turbulent heat and salt exchange coefficients multiplied by 2 only at ice shelf bases in the AS and BS (Table S3).  |
| CTRL       | Turbulent heat and salt exchange coefficients multiplied by 3 only at ice shelf bases in the AS and BS (Table S3).  |
| HMELT      | Turbulent heat and salt exchange coefficients multiplied by 30 only at ice shelf bases in the AS and BS (Table S3). |

---

**Table S3** Antarctic ice shelf basal mass loss from LMELT and HMELT runs and satellite-based estimates [Depoorter et al., 2013, Rignot et al., 2013]. Ice shelf locations are indicated by numbers in Fig. 1. For some ice shelf regions in the Weddell Sea and East Antarctica ((19)-(22) and (24)-(27), respectively), basal melt rates are accumulated for several ice shelves and compared to the satellite-based estimates as indicated in Fig. 1. Turbulent heat and salt exchange coefficients of ice shelves in the AS and BS (**bold**) are increased for HMELT.

| Name                             | LMELT<br>(Gt yr <sup>-1</sup> ) | MMELT<br>(Gt yr <sup>-1</sup> ) | CTRL<br>(Gt yr <sup>-1</sup> ) | HMELT<br>(Gt yr <sup>-1</sup> ) | Satellite-<br>based<br>estimate<br>(Gt yr <sup>-1</sup> ) | References |
|----------------------------------|---------------------------------|---------------------------------|--------------------------------|---------------------------------|-----------------------------------------------------------|------------|
| (1) Ross                         | 110.2                           | 110.5                           | 110.3                          | 110.7                           | 14-82                                                     | (16,17)    |
| (2) Withrow                      | 0.1                             | 0.1                             | 0.1                            | 0.1                             | -0.1-0.7                                                  | (16)       |
| (3) Swinburne-Salzberger         | 16.5                            | 15.6                            | 14.9                           | 12.8                            | 19-26                                                     | (16)       |
| (4) Nickerson-Land               | 3.0                             | 2.9                             | 2.8                            | 2.7                             | 5-11                                                      | (16)       |
| <b>(5) Getz</b>                  | 93.3                            | 139.4                           | 168.3                          | 309.4                           | 117-159                                                   | (16,17)    |
| <b>(6) Dotson</b>                | 13.1                            | 19.6                            | 23.2                           | 33.1                            | 41-49                                                     | (16)       |
| <b>(7) Crosson</b>               | 3.5                             | 4.7                             | 5.3                            | 5.8                             | 35-43                                                     | (16)       |
| <b>(8) Thwaites</b>              | 15.2                            | 22.2                            | 27.0                           | 48.3                            | 91-105                                                    | (16)       |
| <b>(9) Pine Island</b>           | 28.3                            | 42.2                            | 52.6                           | 103.4                           | 81-109                                                    | (16,17)    |
| <b>(10) Cosgrove</b>             | 10.3                            | 15.9                            | 20.3                           | 37.2                            | 7-11                                                      | (16)       |
| <b>(11) Abbot</b>                | 28.5                            | 35.5                            | 39.4                           | 54.5                            | 33-97                                                     | (16,17)    |
| <b>(12) Venable</b>              | 2.4                             | 3.6                             | 4.2                            | 7.3                             | 17-21                                                     | (16)       |
| <b>(13) Ferrigno</b>             | 0.1                             | 0.1                             | 0.2                            | 0.7                             | 3-7                                                       | (16)       |
| <b>(14) Stange</b>               | 23.6                            | 34.6                            | 41.9                           | 79.1                            | 22-34                                                     | (16)       |
| <b>(15) George VI</b>            | 104.4                           | 147.7                           | 176.8                          | 298.7                           | 72-160                                                    | (16,17)    |
| <b>(16) Bach</b>                 | 4.7                             | 7.0                             | 8.9                            | 17.4                            | 9-11                                                      | (16)       |
| <b>(17) Wilkins</b>              | 19.3                            | 25.1                            | 28.3                           | 41.4                            | 1-35                                                      | (16)       |
| <b>(18) Wordie</b>               | 0.1                             | 0.3                             | 0.4                            | 1.7                             | 4-10                                                      | (16)       |
| (19) Larsen B-G                  | 36.4                            | 36.6                            | 36.0                           | 35.3                            | -59-134                                                   | (16,17)    |
| (20) Filchner-Ronne              | 108.5                           | 106.9                           | 107.8                          | 109.1                           | 10-200                                                    | (16,17)    |
| (21) Brunt-Downer                | 101.3                           | 101.2                           | 101.0                          | 100.1                           | 40-162                                                    | (16)       |
| (22) Amery-Publication           | 64.8                            | 64.3                            | 63.8                           | 62.1                            | 12-62                                                     | (16,17)    |
| (23) West                        | 14.6                            | 14.7                            | 14.8                           | 15.0                            | 17-37                                                     | (16)       |
| (24) Shackleton-Glenzer          | 22.1                            | 22.3                            | 22.3                           | 22.2                            | 61-97                                                     | (16)       |
| (25) Vincennes                   | 1.1                             | 1.1                             | 1.1                            | 1.0                             | 3-7                                                       | (16)       |
| (26) Totten-Moscow Univ.         | 9.7                             | 9.6                             | 9.6                            | 9.7                             | 83-99                                                     | (16)       |
| (27) Holmes-Drygalski            | 23.4                            | 22.2                            | 21.3                           | 18.4                            | 33-72                                                     | (16)       |
| Amundsen Sea total (5-11)        | 192.2                           | 280.0                           | 336.0                          | 591.7                           | 405-573                                                   | (16,17)    |
| Bellingshausen Sea total (12-18) | 130.5                           | 186.0                           | 223.1                          | 385.9                           | 128-278                                                   | (16,17)    |
| Antarctic total                  | 837.4                           | 976.3                           | 1068.0                         | 1480.1                          | 1263-1737                                                 | (16,17)    |

**Table S4** Mean Antarctic ice shelf melt rate differences and spatially averaged salinity differences for the last 2 years of model simulations. LMELT fields are subtracted from HMELT, CTRL, and MMELT fields to calculate the differences. We calculate spatial average for the regions indicated in Fig. 1 but using regions shallower than 1000 m and regions deeper than 2500 m for on-shelf 200-m spatially averaged and bottom spatially averaged salinity, respectively (Table S3).

|                                                                                                    | HMELT-LMELT | CTRL-LMELT | MMELT-LMELT |
|----------------------------------------------------------------------------------------------------|-------------|------------|-------------|
| Total melt rate difference (Gt yr <sup>-1</sup> )                                                  | 643         | 231        | 138         |
| RS continental shelf salinity difference at 200-m depth (g kg <sup>-1</sup> )                      | -0.14       | -0.045     | -0.025      |
| Deep RS basin salinity difference at bottom (g kg <sup>-1</sup> )                                  | -0.015      | -0.0048    | -0.0030     |
| Continental shelf region off Cape Darnley salinity difference at 200-m depth (g kg <sup>-1</sup> ) | -0.035      | -0.0078    | -0.0038     |
| Weddell Sea continental shelf salinity difference at 200-m depth (g kg <sup>-1</sup> )             | -0.016      | -0.0035    | -0.0003     |

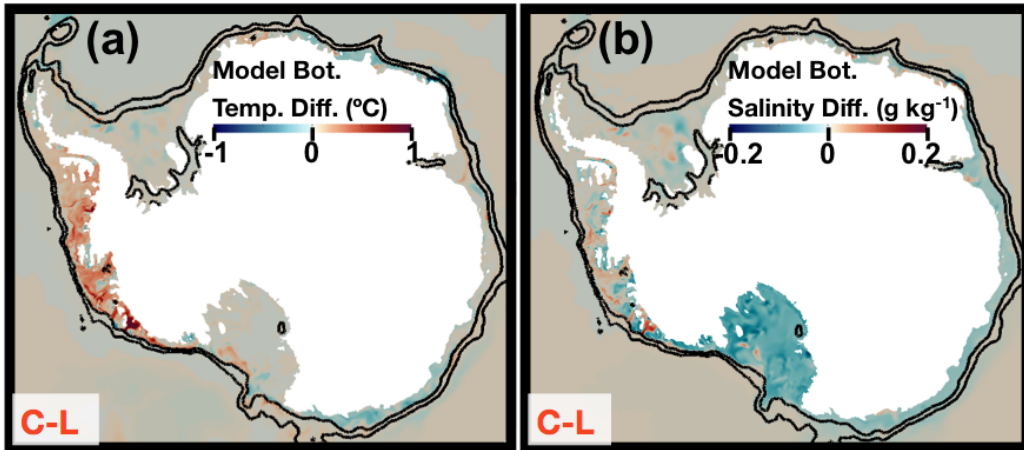

**Figure S1**

Simulated bottom (a) potential temperature and (b) absolute salinity differences between CTRL and LMELT for year 32.

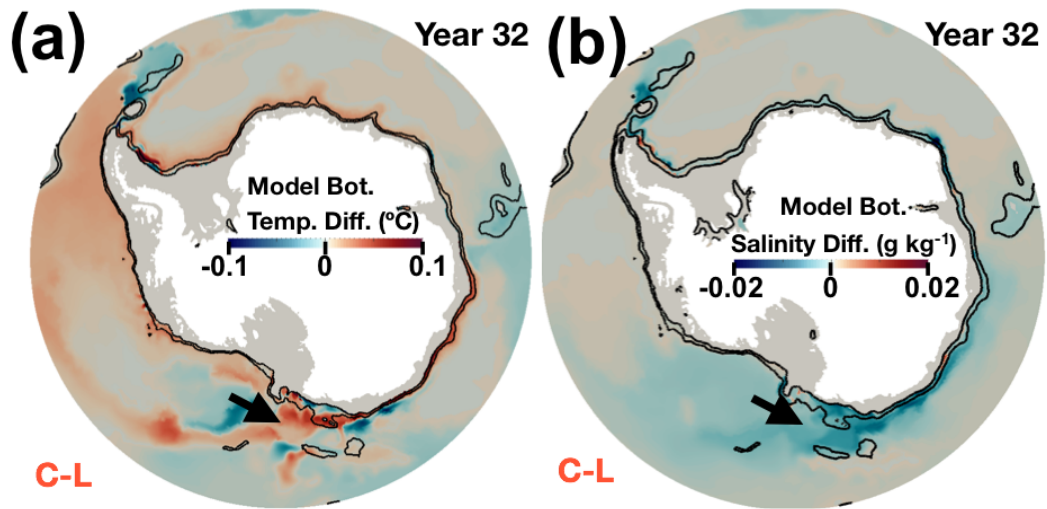

**Figure S2**

January mean bottom (a) temperature and (b) absolute salinity differences between CTRL and LMELT (H-L) for year 32. Only the region deeper than 1500m is shown. The bathymetry contours of 1000 m and 2500 m are shown as black lines. The black arrow indicates locations of intensified warming and freshening.
